# Supplementary material
Source: Royal Society of Chemistry journal article supplement (https://www.rsc.org/suppdata/em/1999/563/supp_data.doc)
Supplement: Supplementary file 1 [file supp_data.doc]

**Supplementary Data**

Table I shows the interlaboratory exercise on five samples16 obtained from plants of physical-chemical treatment (the COD values were average of four determinations). The results found by the proposed method and those of the authorized laboratory (Hidrocen) were statistically indistinguishable in all the samples except in the sample 10/1338

# Table I Determination of the COD in industrial residues by the proposed and the standard method

| Sample | COD/mg l-1 | |
| --- | --- | --- |
|  | FI method+(%)RSD | Standard method |
| 12/1446 | a1340+0.5 | 1333 |
| 10/1338 | b12161+0.6 | 8000 |
| 11/1413 | c18635+1.1 | 18400 |
| 11/1427 | d46345+0.8 | 46000 |
| P/684 | e88355+0.7 | 88000 |

a1:250 dilution

b1:5000 dilution

c1:5000 dilution

d1:10000 dilution

e1:18000 dilution

# Supplementary Data

# Table II shows the results of the validation of the FI method using the certified reference material.16

# Table II Validation of the method (CRM QC Plus+ Demand Quality Control Standard)

| aDilution | bCertified Value/mg l-1+cSmt | Value FI/mg l-1+ cSmt |
| --- | --- | --- |
| 1:60 | 260+3 | 257+1.4 |
| 1:75 | 260+3 | 256+1.7 |
| 1:100 | 260+3 | 255+3.2 |

aDilutions of the 260 mg COD l-1 stock solution

bValue certified by the analytical EPA method 410.4

cSmt = (t*n)/ n [t(N=3, 95%), n=4]
